1 **A heuristic method for fast and accurate phasing and**  
2 **imputation of single nucleotide polymorphism data in bi-**  
3 **parental plant populations**

4

5 Serap Gonen, Valentin Wimmer, R. Chris Gaynor, Ed Byrne, Gregor Gorjanc, John  
6 M. Hickey\*

7

8 S. Gonen, G. Gorjanc, R.C. Gaynor and J.M. Hickey The Roslin Institute and Royal  
9 (Dick) School of Veterinary Studies, University of Edinburgh, Easter Bush Research  
10 Centre, Midlothian EH25 9RG, UK

11 V. Wimmer KWS SAAT SE, Grimsehlstr. 31, 37574 Einbeck, Germany

12 E. Byrne KWS-UK Ltd, 56 Church Street, Thriplow, Hertfordshire, SG8 7RE, UK

13 Received \_\_\_\_\_ \*Corresponding author ([john.hickey@roslin.ed.ac.uk](mailto:john.hickey@roslin.ed.ac.uk))

14

15 **Abbreviations:** LD, low-density; HD, high-density; SNP, single nucleotide  
16 polymorphism; cM, centiMorgan.

## 17 **Abstract**

18           This paper presents a new heuristic method for phasing and imputation of  
19 genomic data in diploid plant species. Our method, called AlphaPlantImpute,  
20 explicitly leverages features of plant breeding programs to maximise the accuracy of  
21 imputation. The features are a small number of parents, which can be inbred and  
22 usually have high-density genomic data, and few recombinations separating parents  
23 and focal individuals genotyped at low-density (i.e. descendants that are the  
24 imputation targets). AlphaPlantImpute works roughly in three steps. First, it identifies  
25 informative low-density genotype markers in parents. Second, it tracks the inheritance  
26 of parental alleles and haplotypes to focal individuals at informative markers. Finally,  
27 it uses this low-density information as anchor points to impute focal individuals to  
28 high-density.

29           We tested the imputation accuracy of AlphaPlantImpute in simulated bi-  
30 parental populations across different scenarios. We also compared its accuracy to  
31 existing software called PlantImpute. In general, AlphaPlantImpute had better or  
32 equal imputation accuracy as PlantImpute. The computational time and memory  
33 requirements of AlphaPlantImpute were tiny compared to PlantImpute. For example,  
34 accuracy of imputation was 0.96 for a scenario where both parents were inbred and  
35 genotyped at 25,000 markers per chromosome and a focal  $F_2$  individual was  
36 genotyped with 50 markers per chromosome. The maximum memory requirement for  
37 this scenario was 0.08 GB and took 37 seconds to complete.

## 38 **Introduction**

39           This paper presents a new heuristic method for phasing and imputation of  
40 single nucleotide polymorphism (SNP) array data in diploid plant species. High-  
41 density SNP array data in plant breeding populations is increasingly valuable for  
42 genomic selection and for identifying regions of the genome that underlie traits of  
43 interest in genome-wide association studies. The accuracy of genomic selection and  
44 power of association studies increases with the number of individuals and with the  
45 density of SNP markers. However, the cost of genotyping many individuals at high-  
46 density is high. This high cost is a barrier to the adoption of genomic selection in  
47 plant breeding programs where the number of selection candidates in each cycle can  
48 be very large. An effective strategy to overcome this cost barrier is to genotype a  
49 proportion of the population at high-density, phase their genotypes, and use this data  
50 for imputation of large numbers of individuals genotyped at low-density (Jacobson et  
51 al., 2014, 2015; Gorjanc et al., 2017a; b). This strategy has been widely adopted in  
52 livestock and human populations, partly because genotype imputation tools that work  
53 well in these populations are widely available (Kong et al., 2008; Howie et al., 2009;  
54 Druet and Georges, 2010; Li et al., 2010; Sargolzaei et al., 2011; Hickey et al., 2011;  
55 Cleveland and Hickey, 2013; Hickey and Kranis, 2013; VanRaden et al., 2015;  
56 O’Connell et al., 2016; Loh et al., 2016; Antolín et al., 2017).

57           Bi-parental populations that are widely used in plant breeding have four  
58 features that make them ideal for imputation. First, they are derived from only two  
59 parents. High-density genotyping of the two parents and low-density genotyping of  
60 focal individuals (i.e., descendants that are the imputation targets) is an effective low-  
61 cost strategy in these populations. Second, the number of meioses separating parents

62 and focal individuals is small. This means that parental haplotypes remain largely  
63 intact in focal individuals, which simplifies imputation. Third, they have well-known  
64 crossing structures that could be informative for imputation, although the process of  
65 selfing or the creation of doubled haploids can add complications that are not present  
66 in human and livestock settings. However, these “complications” can in certain  
67 situations empower imputation. Finally, parents that contribute to a bi-parental  
68 population are usually inbred. This means that they are homozygous at many loci and  
69 the majority of their genome is phased *de facto*.

70         A recent simulation study demonstrated that achieving high imputation  
71 accuracies could empower genomic selection in bi-parental populations (Gorjanc et  
72 al., 2017a; b). The high imputation accuracies with SNP array data were achieved  
73 using the PlantImpute software (Nettelblad et al., 2009; Hickey et al., 2015). The  
74 main drawback of PlantImpute is that it has large computational requirements in  
75 terms of time and memory. This makes it impractical for routine use in breeding  
76 programs. Existing software for imputation in livestock or human populations do not  
77 have large computational requirements. However, software for imputation in livestock  
78 or human populations are not designed to leverage features of plant breeding  
79 programs, and in some cases, cannot work where selfing and bi-sexuality is common.  
80 To our knowledge, existing imputation software for plant breeding programs (e.g.,  
81 (Swarts et al., 2014)) are not explicitly designed for imputation of SNP array  
82 genotypes in bi-parental populations.

83         This paper presents a new heuristic method, called AlphaPlantImpute, for  
84 phasing and imputation of SNP array data in diploid plant species. AlphaPlantImpute  
85 works roughly in three steps. First, it identifies markers fully or partially informative

86 for parent-of-origin. Second, it tracks the inheritance of parental alleles and  
87 haplotypes to focal individuals at informative markers. Finally, it uses this low-  
88 density information as anchor points to impute focal individuals to high-density.

89 We tested the accuracy of AlphaPlantImpute in simulated bi-parental  
90 populations across different scenarios. These scenarios varied in the levels of  
91 inbreeding in the parents, the number of selfing events separating parents and focal  
92 individuals, the chromosome size (i.e. recombination rate) and the number of markers  
93 on the low-density array. We calculated the accuracy of imputation within each  
94 scenario as the correlation between the true and imputed genotypes. In general,  
95 AlphaPlantImpute gave excellent accuracy of imputation and typically outperformed  
96 or performed equally as well as PlantImpute for the accuracy of imputation. The  
97 computational time and memory requirements of AlphaPlantImpute were always tiny  
98 compared to that of PlantImpute.

## 99 **Materials and methods**

### 100 *Definitions*

101           A focal individual is an individual that is to be imputed. A fully informative  
102 marker is one where the two parents have opposing homozygous genotypes, i.e.,  
103 genotypes 0 and 2 (note that the method is agnostic of which allele is the reference  
104 allele). A partially informative marker is where one parent is homozygous and the  
105 other is heterozygous. Markers where parents are fixed for the same allele or where  
106 both parents are heterozygous are uninformative. The high-density (**HD**) array is the  
107 array at which parents have genotypes and is the target array for imputation. In our  
108 test datasets, the HD array consisted of 25,000 SNP markers. The low-density (**LD**)  
109 array is the array at which focal individuals have genotypes. We tested eight LD  
110 arrays (see below), all of which were nested subsets of the HD array.

### 111 *Description of the method*

112           We present a new heuristic method, called AlphaPlantImpute, for phasing and  
113 imputation of SNP array data in diploid plant species. In detail, our method has five  
114 steps: (1) Identify markers that are informative for parent-of-origin of alleles in focal  
115 individuals; (2) Infer the most likely linked alleles at two markers; (3) Phase and  
116 assign parent-of-origin for focal individual's alleles; (4) Impute focal individual to  
117 high-density using low-density anchors captured in step 3; and (5) Impute markers in  
118 recombined regions. Impute markers adjacent to recombination locations. Step 1 is  
119 the only step applied to groups of focal individuals together. Steps 2, 3, 4 and 5 are  
120 applied for each focal individual separately. A description of the definitions used and

121 of each step is given below and a schematic is given in Figure 1 (a more detailed  
122 schematic is given in Supplementary Figure 1).

### 123 *Method steps*

#### 124 Step 1: Identify informative low-density markers in parents

125 In the first step we determine which low-density markers are fully or partially  
126 informative in parents, which is used in the following steps to infer parent-of-origin of  
127 phased alleles in focal individuals. For example, in Figure 1 eight of the ten markers  
128 on the HD array genotyped in the parents are fully informative and two (markers 2  
129 and 9) are uninformative. Of the ten HD markers, five (markers 1, 3, 5, 7, 9) are also  
130 on the LD array, which was used to genotype focal individuals. Of these five LD  
131 markers, four are informative and one (marker 9) is uninformative.

#### 132 Step 2: Infer the most likely linked alleles at two markers

133 In the second step we infer the most likely linked alleles at two markers for all  
134 pairs of informative markers, which is used in the following steps to phase  
135 heterozygous markers in focal individuals. If parent haplotypes are inherited directly  
136 without recombination, the most likely linked alleles at two markers recover the  
137 parent haplotypes. When this is not the case, the most likely linked alleles at two  
138 markers indicate a potential recombination hotspot or marker map error for the  
139 population. For each pair of informative markers we perform three steps.

140 2a) First, identify focal individuals that are homozygous at the first and the  
141 second marker.

142 2b) Second, count the number of times focal individuals have genotype:

- 143                   • 0 for the first and 0 for the second marker (diplotype 0-0),
- 144                   • 0 for the first and 2 for the second marker (diplotype 0-2),
- 145                   • 2 for the first and 0 for the second marker (diplotype 2-0), and
- 146                   • 2 for the first and 2 for the second marker (diplotype 2-2).

147                   2c) Third, compare the count of 0-0 to 0-2 and of 2-2 to 2-0. If the count of 0-  
148 0 is higher than 0-2 and 2-2 is higher than 2-0, then the 0 (1) allele at the first marker  
149 is commonly linked to the 0 (1) allele at the second marker. If the count of 0-2 is  
150 higher than 0-0 and 2-0 is higher than 2-2, then the 0 (1) allele at the first marker is  
151 commonly linked to the 1 (0) allele at the second marker. For example, in Figure 1 2-  
152 2 and 0-0 are the two most frequent diplotypes at markers 1 and 3, which suggests the  
153 most likely linked alleles are 1-1 and 0-0.

### 154 Step 3: Phase and assign parent-of-origin for focal individual's alleles

155                   In the third step we phase alleles in focal individuals and assign their parent-  
156 of-origin. We perform this first for the homozygous markers and then for the  
157 heterozygous markers.

#### 158 *3a) Phase homozygous markers*

159                   We phase alleles at homozygous markers as the 0 allele for both haplotypes  
160 when the genotype is 0 and as the 1 allele when the genotype is 2. For example, in  
161 Figure 1 the focal individual ID\_Y has genotype 2 for marker 7 and we phase it as the  
162 1 allele for both haplotypes.

#### 163 *3b) Assign parent-of-origin to alleles at homozygous markers*



164 We assign parent-of-origin for phased alleles in the step 3a based on the  
165 informative markers in the step 1. For example, in Figure 1 marker 7 is informative.  
166 At this marker, the Parent\_A has the 0 allele, while the Parent\_B has the 1 allele.  
167 Focal individual ID\_Y has genotype 2, which suggests that both of the 1 alleles were  
168 inherited from the Parent\_B. Focal individual ID\_Y is also homozygous at marker 9,  
169 with genotype 0, but this marker is not informative and we cannot assign parent-of-  
170 origin to phased alleles.

### 171 *3c) Phase heterozygous marker*

172 We phase alleles at heterozygous markers iteratively based on the most likely  
173 linked alleles in the step 2. Specifically, we perform four steps. We start at the first  
174 heterozygous marker . For example, in Figure 1 the first marker for which the focal  
175 individual ID\_Y is heterozygous is marker 1.

176 3c1) First, phase the first heterozygous marker randomly as the 1 allele for the  
177 first haplotype and the 0 allele for the second haplotype.

178 3c2) Second, phase the second heterozygous marker based on the the most  
179 likely linked alleles in the step 2. For example, in Figure 1 the second heterozygous  
180 marker is marker 3. Information from the most likely linked alleles suggest that the 0  
181 (1) allele at marker 1 is linked to the 0 (1) allele at marker 3. Using this information,  
182 we phase marker 3 alleles of ID\_Y as the 1 allele for the first haplotype and the 0  
183 allele for the second haplotype. We continue moving from left-to-right until the last  
184 heterozygous marker is phased.

185 3c3) Third, we repeat steps 3c1 and 3c2, but this time starting from the last  
186 heterozygous marker and progressing to the first heterozygous marker.

187           3c4) Finally, we derive a consensus between the haplotypes derived from  
188 moving left-to-right and right-to-left along the chromosome. If they disagree, set the  
189 consensus haplotypes to missing. If only one is filled, set the consensus haplotype to  
190 the filled information.

191           *3d) Assign parent-of-origin to alleles at heterozygous marker*

192           We assign parent-of-origin for phased alleles in the step 3c based on the  
193 informative markers in the step 1. For example, in Figure 1 focal individual ID\_Y is  
194 heterozygous at marker 1. At this marker, the 1 allele on ID\_Y's first haplotype is  
195 inherited from Parent\_A and the 0 allele on ID\_Y's second haplotype is inherited  
196 from Parent\_B. If the marker is partially informative, we assign both the parent-of-  
197 origin and the haplotype-of-origin (i.e., first or second haplotype of the parent that is  
198 heterozygous for that marker).

199   Step 4: Impute focal individual to high-density using anchors from the step 3

200           *4a) Fill uninformative homozygous markers*

201           For uninformative homozygous markers at HD that are not genotyped in the  
202 focal individual at LD, we phase and impute the focal individual with the parental  
203 information. For example, in Figure 1 both parents have genotype 0 for marker 2, so  
204 focal individual ID\_Y is imputed as genotype 0.

205           *4b) Assign parent-of-origin to HD marker alleles*

206           For markers on the HD array, assign parent-of-origin to marker alleles based  
207 on the parent-of-origin assignment of the two nearest marker alleles on the LD array.  
208 For example, in Figure 1 marker 6 is not genotyped on the LD array but the two

209 neighbouring markers 5 and 7 are genotyped on the LD array. We have assigned the  
210 second haplotype of focal individual ID\_Y to Parent\_B for both markers 5 and 7. We  
211 therefore also assign marker 6 to Parent\_B for the second haplotype. We have  
212 assigned the first haplotype of focal individual ID\_Y to Parent\_A for marker 5 and to  
213 Parent\_B for marker 7. We conclude that there was a potential recombination around  
214 marker 6 at the first haplotype and we do not assign parent-of-origin for this allele.

215 *4c) Phase and impute HD markers using parent-of-origin assignment from*  
216 *step 4b*

217 For HD markers with assigned parent-of-origin in step 4b, we phase the allele  
218 inherited from that parent for the haplotype of the focal individual. If we have phased  
219 both alleles at a marker, we impute the genotype as the sum of the two alleles on the  
220 two haplotypes of the focal individual. If parent-of-origin has not been assigned for  
221 one or both alleles of the focal individual, we leave the genotype as missing.

## 222 Step 5. Impute markers in recombined regions

223 We phase and impute missing HD markers in potentially recombined regions  
224 in one of two ways. We either (1) impute expected genotype dosage as the average of  
225 the alleles of the two parents; or (2) phase and impute using information from a  
226 genetic or physical map. For (2), we first identify the two closest neighbouring  
227 markers that were informative and phased, second use the distance between these two  
228 markers as a weight to phase the missing alleles as the weighted average of the alleles  
229 of the two parent haplotypes, and third impute expected genotype dosage as in (1).

230 *Implementation*

231           We have implemented the method in a program called AlphaPlantImpute,  
232           which is controlled by a specification file that contains some user specified thresholds  
233           and the addresses of input files. The required input data are membership of  
234           individuals to the bi-parental populations, HD genotypes for parents, and LD  
235           genotypes of focal individuals. The output data are imputed genotypes, phased  
236           haplotypes, inferred parent-of-origin for focal individual haplotypes, and information  
237           on whether a marker is informative. AlphaPlantImpute implements some data editing  
238           checks, which are described in the user manual.

239           *Examples of implementation: Description of datasets*

240           To test the imputation accuracy of AlphaPlantImpute, testing datasets of a  
241           subset of the scenarios described in Hickey et. al. 2015 were simulated. This enabled  
242           the comparison of AlphaPlantImpute with PlantImpute without re-running  
243           PlantImpute with its large computational cost. Although the simulation design is  
244           largely a replication of that in Hickey et. al. 2015, a brief description of the general  
245           structure and simulation method of the different scenarios tested is given below for  
246           completeness.

247           *Simulation of genomic data*

248           Sequence data for 100 base haplotypes for a single chromosome were  
249           simulated using the Markovian Coalescent Simulator (Chen et al., 2009) and  
250           AlphaSim (Faux et al., 2016). The base haplotypes were  $10^8$  base pairs in length, with  
251           a per site mutation rate of  $1.0 \times 10^{-8}$  and a per site recombination rate that varied across  
252           scenarios. The different recombination rates simulated were  $0.25 \times 10^{-8}$ ,  $0.5 \times 10^{-8}$ ,  
253            $1.0 \times 10^{-8}$ ,  $1.5 \times 10^{-8}$ ,  $2.0 \times 10^{-8}$ ,  $3.0 \times 10^{-8}$ , and  $4.0 \times 10^{-8}$ , resulting in chromosome sizes

254 of 25, 50, 100, 150, 200, 300, and 400 centiMorgans (cM), respectively. The effective  
255 population size ( $N_e$ ) was set at specific points during the simulation to mimic changes  
256 in  $N_e$  in a crop such as maize (*Zea mays L.*). These set points were: 100 in the base  
257 generation, 1000 at 100 generations ago, and 10,000 at 2000 generations ago, with  
258 linear changes in between. The resulting whole-chromosome haplotypes had  
259 approximately 80,000 segregating sites in total.

### 260 *Simulation of a pedigree*

261 A pedigree of 11,266 individuals was constructed. The pedigree was initiated  
262 from six outbred founders (A, B, C, D, E, F). These six founders were crossed to  
263 generate the founder bi-parental populations (AxB, CxD, ExF). These founder bi-  
264 parental populations were selfed to  $F_1$ ,  $F_2$ ,  $F_4$ ,  $F_{10}$ , or  $F_{20}$ , resulting in different levels  
265 of inbreeding in the parents. To properly propagate the residual heterozygosity in  
266 these parents, they were crossed to generate 100 pairs of  $F_1$  individuals.  $F_1$  individuals  
267 were selfed to generate 100  $F_2$  individuals.  $F_2$  individuals were selfed to generate 100  
268  $F_3$  individuals, and selfing continued through to  $F_{10}$ . The focal individuals (i.e.  
269 descendants that were the imputation targets) were  $F_2$ ,  $F_4$ ,  $F_6$ , or  $F_{10}$  descendants.

270 In the base generation, individuals had their chromosomes sampled from the  
271 100 base haplotypes. In subsequent generations the chromosomes of each individual  
272 was sampled from parental chromosomes with recombination. The recombination rate  
273 varied depending on the scenario resulting in chromosome sizes of 25, 50, 100, 150,  
274 200, 300, and 400 centiMorgans (cM). Recombinations occurred with a 1%  
275 probability per cM and were uniformly distributed along the chromosome.

### 276 *Simulated SNP marker arrays*

277           A single HD array of 25,000 SNP markers for the single chromosome was  
278 simulated. To test the effect of the number of markers on the LD array, eight LD  
279 arrays of 3, 5, 10, 20, 50, 100, 200, and 400 markers for the single chromosome were  
280 simulated. Arrays were constructed by aiming to select a set of markers that  
281 segregated in the parents and that were evenly distributed across the chromosome. All  
282 LD arrays were nested within each other and within the HD array.

### 283 *Scenarios*

284           The imputation accuracy of AlphaPlantImpute and PlantImpute were  
285 compared in four different scenarios (scenario 1, 2, 3, and 4). Scenarios 1, 2, and 3  
286 were the same as scenarios 2, 4, and 5 in Hickey et al. 2015. A description of all four  
287 scenarios is provided below. In all scenarios, focal individuals genotyped at LD were  
288 imputed to the single HD array of 25,000 SNP markers. Ten replications of each  
289 scenario were performed and the average of each replication is reported in the results.

290           Scenario 1: The effect of the number of selfing events separating parents and  
291 focal individuals. Parents were almost fully inbred ( $F_{20}$ ) and chromosomes were 100  
292 cM in length. The accuracy of imputation was assessed for  $F_2$ ,  $F_4$ ,  $F_6$ , and  $F_{10}$  focal  
293 individuals.

294           Scenario 2: The effect of the level of inbreeding in parents. Parents were  $F_1$ ,  
295  $F_2$ ,  $F_4$ ,  $F_{10}$ , or  $F_{20}$  and chromosomes were 100 cM in length. The accuracy of  
296 imputation was assessed for  $F_2$  focal individuals.

297           Scenario 3: The effect of chromosome size. Parents were fully inbred ( $F_{20}$ ) and  
298 the accuracy of imputation was assessed for  $F_2$  focal individuals. Chromosomes were  
299 25, 50, 100, 150, 200, 300, or 400 cM in size.

300           Scenario 4: The effect of number of focal individuals in the bi-parental  
301 population. Parents were fully inbred ( $F_{20}$ ) and the accuracy of imputation was  
302 assessed for  $F_2$  focal individuals. Subsets of focal individuals were randomly selected  
303 from the 100 focal individuals to generate bi-parental population sizes of 1, 5, 10, 25,  
304 and 50 focal individuals.

305    *Analysis*

306           Imputation was performed within each bi-parental population. Parents were  
307 assumed genotyped at HD and focal individuals were assumed genotyped at LD. The  
308 imputation accuracy was calculated for each focal individual as the correlation  
309 between the true and imputed genotypes. The precision in imputation accuracy was  
310 calculated as the log of the inverse of the variance in imputation accuracy within each  
311 bi-parental population.

312

## 313 **Results**

314 For each scenario, we first present the imputation accuracy of  
315 AlphaPlantImpute and then compare it to PlantImpute (Nettelblad et al., 2009; Hickey  
316 et al., 2015).

### 317 *Effect of the number of markers on the low-density array*

318 Increasing the number of LD markers increases the imputation accuracy of  
319 AlphaPlantImpute. Figure 2 plots the number of LD markers against the accuracy of  
320 imputation for  $F_2$  focal individuals of an  $F_{20} \times F_{20}$  bi-parental cross. Figure 2 shows  
321 that increasing the number of LD markers from 3 to 20 SNP increased the average  
322 imputation accuracy from 0.85 to 0.96. Increasing the number of markers beyond 20  
323 achieved only a slight increase in the accuracy of imputation from 0.96 with 20  
324 markers to  $>0.99$  with 400 markers.

### 325 *Scenario 1: Effect of the number of selfing events separating parents and focal* 326 *individuals*

327 Increasing the number of selfing events separating parents and focal  
328 individuals slightly decreases the imputation accuracy of AlphaPlantImpute. Figure  
329 3a plots the accuracy of imputation in  $F_2$ ,  $F_4$ ,  $F_6$  and  $F_{10}$  focal individuals of a bi-  
330 parental population where the parents were  $F_{20}$ . Figure 3a shows that with 3 LD  
331 markers, the average imputation accuracy decreased from 0.85 for  $F_2$  focal individuals  
332 to 0.77 for  $F_{10}$  focal individuals. Increasing the number of LD markers beyond 10  
333 markers mitigates the decrease in the average imputation accuracy between  $F_2$  focal  
334 individuals and  $F_{10}$  focal individuals. Figure 3a shows that with 20 LD markers, the



335 average imputation accuracy decreased from 0.96 for  $F_2$  focal individuals to 0.95 for  
336  $F_{10}$  focal individuals.

337       Regardless of the number of selfing events separating parents and focal  
338 individuals, the accuracy of imputation for AlphaPlantImpute was higher than for  
339 PlantImpute when the number of LD markers was low. Figure 3b plots the average  
340 imputation accuracy of AlphaPlantImpute on the y-axis and for PlantImpute on the x-  
341 axis. The colours represent the different number of LD markers and the shapes  
342 represent the number of selfing events separating the parents and the focal  
343 individuals. The red diagonal line indicates when the imputation accuracy of the two  
344 methods is equal. Points above the line indicate when the accuracy of imputation was  
345 higher for AlphaPlantImpute than for PlantImpute and visa versa. Figure 3b shows  
346 that with 3 LD markers, the average accuracy of imputation was 0.85 for  
347 AlphaPlantImpute and 0.76 for PlantImpute for  $F_2$  focal individuals and was 0.77 for  
348 AlphaPlantImpute and 0.70 for PlantImpute for  $F_{10}$  focal individuals.

349       For all numbers of selfing events separating parents and focal individuals,  
350 increasing the number of LD markers reduced and in some cases reversed the  
351 advantage of AlphaPlantImpute over PlantImpute. This was most obvious for  $F_{10}$   
352 focal individuals for medium number of LD markers where the imputation accuracy  
353 with PlantImpute was slightly higher than with AlphaPlantImpute. Figure 3b shows  
354 that with 10 LD markers, the average imputation accuracy was 0.93 for  
355 AlphaPlantImpute and 0.94 for PlantImpute for  $F_2$  focal individuals and was 0.90 for  
356 AlphaPlantImpute and 0.92 for PlantImpute for  $F_{10}$  focal individuals. Increasing the  
357 number of LD markers beyond 100 markers meant that the average accuracy of  
358 imputation for AlphaPlantImpute equalled that for PlantImpute. Figure 3b shows that

359 with 100 LD markers, the average imputation accuracy was 0.99 for both  
360 AlphaPlantImpute and PlantImpute for  $F_2$  focal individuals and for  $F_{10}$  focal  
361 individuals.

362 For all numbers of selfing events separating parents and focal individuals, the  
363 precision of imputation accuracy (i.e., consistency across focal individuals) for  
364 AlphaPlantImpute was higher than for PlantImpute when the number of LD markers  
365 was low. Figure 3c is similar to Figure 3b and plots the log of the precision of  
366 imputation accuracy for AlphaPlantImpute on the y-axis and PlantImpute on the x-  
367 axis. Points above the line indicate better precision (i.e. less variance) for  
368 AlphaPlantImpute than for PlantImpute, and vice versa. Figure 3c shows that with 3  
369 LD markers, the precision of imputation was 1.62 for AlphaPlantImpute and 1.08 for  
370 PlantImpute for  $F_2$  focal individuals and was 1.32 for AlphaPlantImpute and 1.11 for  
371 PlantImpute for  $F_{10}$  focal individuals.

372 Figure 3c also shows that for medium number of LD markers, the precision of  
373 imputation accuracy for AlphaPlantImpute was higher than for PlantImpute for  $F_2$   
374 focal individuals but was lower when the number of selfing events was higher. With  
375 20 LD markers, the precision of imputation accuracy was 2.48 for AlphaPlantImpute  
376 and 2.00 for PlantImpute for  $F_2$  focal individuals and was 2.57 for AlphaPlantImpute  
377 and 2.80 for PlantImpute for  $F_{10}$  focal individuals. With the highest number of LD  
378 markers (400), the precision of imputation accuracy was 3.84 for AlphaPlantImpute  
379 and 4.00 for PlantImpute for  $F_2$  focal individuals and was 5.40 for both  
380 AlphaPlantImpute and PlantImpute for  $F_{10}$  focal individuals.

381 *Scenario 2: Effect of the level of inbreeding in parents*

382           Increasing the level of inbreeding in the parents increases the imputation  
383 accuracy for AlphaPlantImpute. Figure 4a plots the accuracy of imputation in  $F_2$  focal  
384 individuals of a bi-parental population where the parents were  $F_1$ ,  $F_2$ ,  $F_4$ ,  $F_{10}$  or  $F_{20}$ .  
385 Figure 4a shows that with 20 LD markers, the average imputation accuracy increased  
386 from 0.81 for  $F_1$  parents to 0.96 for  $F_{20}$  parents. Figure 4a also shows that increasing  
387 the level of inbreeding in the parents beyond  $F_4$  did not increase the average accuracy  
388 of imputation for  $F_2$  focal individuals. The average imputation accuracy with 20 LD  
389 markers was approximately 0.96 for  $F_2$  focal individuals when parents were  $F_4$ ,  $F_{10}$ ,  
390 and  $F_{20}$ .

391           For all levels of inbreeding in the parents and all numbers of LD markers, the  
392 average imputation accuracy with AlphaPlantImpute was almost always higher than  
393 with PlantImpute. Figure 4b is similar to Figure 3b and plots the average imputation  
394 accuracy for AlphaPlantImpute on the y-axis and for PlantImpute on the x-axis. The  
395 shapes represent the level of inbreeding in the parents. Figure 4b shows that with 20  
396 SNP LD markers, the average imputation accuracy was 0.81 for AlphaPlantImpute  
397 and 0.74 for PlantImpute for  $F_2$  focal individuals when parents were  $F_1$ , 0.95 for  
398 AlphaPlantImpute and 0.91 for PlantImpute when parents were  $F_4$ , and 0.96 for  
399 AlphaPlantImpute and 0.94 for PlantImpute when parents were  $F_{10}$ . In two cases, the  
400 average imputation accuracy with PlantImpute was slightly higher than with  
401 AlphaPlantImpute. This was when parents were  $F_4$  and with 3 and 5 LD markers. The  
402 average imputation accuracy was 0.84 for AlphaPlantImpute and 0.80 for PlantImpute  
403 with 3 LD markers and was 0.87 for AlphaPlantImpute and 0.85 for PlantImpute with  
404 5 LD markers.

405 For all levels of inbreeding in the parents and all numbers of LD markers, the  
406 precision of imputation accuracy with AlphaPlantImpute was almost always higher  
407 than with PlantImpute. Figure 4c is similar to 3c and plots the log of the precision of  
408 imputation accuracy for AlphaPlantImpute on the y-axis and PlantImpute on the x-  
409 axis. Figure 4c shows that with 20 LD markers, the precision of imputation accuracy  
410 was 2.16 for AlphaPlantImpute and 1.92 for PlantImpute for  $F_2$  focal individuals  
411 when parents were  $F_1$ , 2.54 for AlphaPlantImpute and 1.84 for PlantImpute when  
412 parents were  $F_4$ , and 2.52 for AlphaPlantImpute and 1.71 for PlantImpute when  
413 parents were  $F_{10}$ . In a few cases, the precision of imputation accuracy for PlantImpute  
414 was slightly higher than AlphaPlantImpute. This was mainly when parents were  $F_{20}$   
415 and with 50, 200, and 400 LD markers. The precision of imputation accuracy was  
416 3.04 for AlphaPlantImpute and 3.40 for PlantImpute with 50 LD markers, was 3.71  
417 for AlphaPlantImpute and 4.00 for PlantImpute with 200 LD markers, and was 3.84  
418 for AlphaPlantImpute and 4.00 for PlantImpute with 400 LD markers.

#### 419 *Scenario 3: Effect of chromosome size*

420 Increasing the chromosome size (in cM) decreased the imputation accuracy  
421 for AlphaPlantImpute. This was most apparent when the number of LD markers was  
422 10 or less. Figure 5a plots the imputation accuracy for seven chromosome sizes of 25,  
423 50, 100, 150, 200, 300, and 400 cM for  $F_2$  focal individuals of a bi-parental  
424 population where the parents were  $F_{20}$ . Figure 5a shows that with 3 LD markers,  
425 quadrupling the chromosome size from 25 cM to 100 cM decreased the average  
426 imputation accuracy from 0.95 to 0.85, and quadrupling from 100 cM to 400 cM  
427 decreased the average imputation accuracy from 0.85 to 0.55. The reduction in the  
428 imputation accuracy was less or non-existent when the number of LD markers was

429 higher than 10. Figure 5a shows that the imputation accuracy was approximately 0.98  
430 for all chromosome sizes when the number of LD markers was 50.

431 When the chromosome size was 300 cM or less, the average imputation  
432 accuracy was higher for AlphaPlantImpute than for PlantImpute. Figure 5b is similar  
433 to Figure 3b and plots the average imputation accuracy for AlphaPlantImpute on the  
434 y-axis and for PlantImpute on the x-axis. The shapes represent the chromosome sizes.  
435 Figure 5b shows that with 3 LD markers, the average imputation accuracy was 0.95  
436 for AlphaPlantImpute and 0.69 for PlantImpute when the chromosome size was 25  
437 cM and was 0.61 for AlphaPlantImpute and 0.57 for PlantImpute when the  
438 chromosome size was 300 cM. The exception to this was when the chromosome size  
439 was 150 cM, where the average imputation accuracy was 0.70 for AlphaPlantImpute  
440 and 0.83 for PlantImpute. When the chromosome size was 400 cM the average  
441 imputation accuracy was 0.55 for AlphaPlantImpute and 0.51 for PlantImpute when 3  
442 LD markers were used but was 0.61 for AlphaPlantImpute and 0.68 for PlantImpute  
443 when 5 LD markers were used.

444 For all chromosome sizes and numbers of LD markers, the precision of  
445 imputation accuracy for AlphaPlantImpute was generally higher than for PlantImpute.  
446 Figure 5c is similar to Figure 3c and plots the precision of imputation accuracy for  
447 AlphaPlantImpute on the y-axis and for PlantImpute on the x-axis. Figure 5c shows  
448 that with 3 LD markers, the precision of imputation accuracy was 0.71 for  
449 AlphaPlantImpute and 1.78 for PlantImpute when the chromosome size was 25 cM,  
450 was 1.08 for AlphaPlantImpute and 1.62 for PlantImpute when the chromosome size  
451 was 100 cM and was 1.59 for AlphaPlantImpute and 1.20 for PlantImpute when the  
452 chromosome size was 400 cM. The exception to this was when the chromosome size

453 was 150 cM, where the precision of imputation accuracy was 1.17 for  
454 AlphaPlantImpute and 1.46 for PlantImpute.

455 *Scenario 4: Effect of the number of focal individuals in the bi-parental population*

456         Increasing the number of focal individuals in the bi-parental population  
457 slightly increased the imputation accuracy for AlphaPlantImpute. This was most  
458 apparent when the number of LD markers was low. Figure 6 plots the accuracy of  
459 imputation for  $F_2$  focal individuals of an  $F_{20} \times F_{20}$  bi-parental cross with 1, 5, 10, 25,  
460 50 or 100 focal individuals. Figure 6 shows that increasing the number of focal  
461 individuals from 5 to 100 increased the average imputation accuracy from 0.83 to  
462 0.85 when 3 LD markers were used. Figure 6 also shows that when the 10 or more LD  
463 markers were used, increasing the number of focal individuals had no effect on the  
464 imputation accuracy. When the number of LD markers was 400, the average  
465 imputation accuracy was 0.96 with 5 or 100 focal individuals in the bi-parental  
466 population.

467         Figure 6 also shows that when we only imputed one focal individual, the  
468 imputation accuracy fluctuated according to the focal individual that was sampled. As  
469 a result, increasing the number of LD markers did not always increase the imputation  
470 accuracy. For example, the average imputation accuracy was 0.95, 0.91, or 0.94 when  
471 3, 5, or 10 LD markers were used. When 400 LD markers were used, the average  
472 accuracy of imputation was 0.997.

473 *Computational requirements of AlphaPlantImpute*

474         Table 1 summarises the computational requirements of AlphaPlantImpute for  
475 twelve datasets across the three scenarios. Datasets were chosen to reflect the

476 extremes in the number of selfing events separating parents and focal individuals ( $F_2$   
477 vs.  $F_{10}$ ), the level of inbreeding in the parents ( $F_1$  vs.  $F_{20}$ ) and the number of LD  
478 markers (3, 50, or 400). Table 1 shows that the average run time for  
479 AlphaPlantImpute was 22.13 seconds with a maximum of 49.33 seconds. The average  
480 memory requirement for AlphaPlantImpute was 0.08 GB with a maximum of 0.082  
481 GB.

482

## 483 **Discussion**

484 Our results highlight three points for discussion: (i) the performance of  
485 AlphaPlantImpute; (ii) the performance of AlphaPlantImpute compared to  
486 PlantImpute; and (iii) future development of AlphaPlantImpute.

### 487 *Performance of AlphaPlantImpute*

488 This paper presents a new heuristic method, called AlphaPlantImpute, for  
489 phasing and imputation of SNP array data in diploid plant species. AlphaPlantImpute  
490 explicitly leverages features of plant breeding programs to impute LD focal  
491 individuals to HD. The explicit utilisation of pedigree information and heuristics  
492 developed specifically to track the inheritance of parental haplotypes using the LD  
493 genotypes of focal individuals are likely to be the reasons for AlphaPlantImpute's  
494 robust and consistent performance across all tested scenarios. AlphaPlantImpute  
495 achieves high imputation accuracy of between 0.8 and 1.0 for the majority of  
496 scenarios. For scenarios where the imputation accuracy was below 0.8, increasing the  
497 number of LD markers increased the imputation accuracy.

498 Increasing number of selfing events separating parents and focal individuals  
499 from  $F_2$  to  $F_{10}$  only slightly decreases the imputation accuracy. Decreasing the level of  
500 inbreeding in the parents or increasing the chromosome size decreases the imputation  
501 accuracy when the number of LD markers is 10 or less. However, in both cases, the  
502 decrease in the imputation accuracy could be mitigated by increasing the number of  
503 LD markers to 20 SNP or more.

504 Decreasing the number of focal individuals in the bi-parental population  
505 slightly decreases the imputation accuracy. This was most evident when the number



506 of LD markers was 10 SNP or less. The likely cause of this is that inferring the most  
507 likely linkage between alleles for two markers is difficult with fewer focal  
508 individuals, since fewer individuals will be homozygous at the markers. In this case,  
509 the algorithm defaults to the linkage pattern of alleles in the parents. This may be sub-  
510 optimal for imputing markers in regions with elevated recombination rates, i.e.,  
511 hotspots. When there was a single focal individual in the focal family, the accuracy of  
512 imputation for that individual varied. The likely cause of this is whether an individual  
513 had a recombination or whether it had inherited the parental haplotypes without  
514 recombination. One solution to this situation could be to utilise the most likely  
515 linkage from related families with more genotyped focal individuals (see section:  
516 Future work and developments).

517 Overall, the results suggest that for a given population, high imputation  
518 accuracy can be achieved even when the number of LD markers is low, and small  
519 increases in the number of markers can achieve high accuracies depending on the  
520 biology of the species (i.e. recombination rate, obligate outcrossing) and the pedigree  
521 design (outbred, inbred, level of selfing).

#### 522 *Performance of AlphaPlantImpute compared to PlantImpute*

523 The imputation accuracy for AlphaPlantImpute was compared to that for  
524 PlantImpute (Nettelblad et al., 2009; Hickey et al., 2015). In the majority of cases, the  
525 imputation accuracy was higher for AlphaPlantImpute than for PlantImpute. One  
526 exception to this was when the chromosome size was 400 cM and when the number  
527 of LD markers was 20 or less (e.g. 0.88 vs. 0.90 when the number of LD markers was  
528 20). One reason for this could be that unless there is enough information in the  
529 genotypes of focal individual on the LD array, the heuristic algorithm in

530 AlphaPlantImpute is inherently more conservative in determining recombination  
531 regions compared to the probabilistic algorithm in PlantImpute. As such,  
532 AlphaPlantImpute is more likely to leave positions as missing and fill them in as the  
533 parent average in the final step.

534         The precision of imputation accuracy (calculated as the log of the inverse of  
535 the variance in imputation accuracy within each bi-parental population) was also  
536 higher in the majority of cases for AlphaPlantImpute than for PlantImpute. This was  
537 most apparent with small number of LD markers. The higher precision of imputation  
538 accuracy for AlphaPlantImpute is likely a consequence of directly calling allele phase  
539 and parent-of-origin and imputed genotypes in turn. The probabilistic algorithm of  
540 PlantImpute is marginalizing over the all possible phase and genotype, which is  
541 probabilistically correct and handles the uncertainty properly, but it seems this is  
542 lowering the imputation accuracy. One exception to this was when the chromosome  
543 size was 150 cM, where the precision of imputation accuracy was higher for  
544 PlantImpute than for AlphaPlantImpute for all LD arrays.

545         The biggest advantage of AlphaPlantImpute compared to PlantImpute relates  
546 to computational requirements. Hickey et. al. 2015 report that to perform imputation  
547 within a single bi-parental population of 100 F<sub>2</sub> focal individuals, PlantImpute  
548 required a minimum of 3 hours and in excess of 100 GB of memory. In comparison,  
549 AlphaPlantImpute required on average ~22 seconds and ~0.08 GB of memory for all  
550 tested scenarios.

551         The high and consistent accuracies achieved with very low computational  
552 requirements makes AlphaPlantImpute an attractive, reliable and practical tool for

553 routine use in plant breeding programs that are already using or will include SNP  
554 array data to inform selection decisions.

555 *Future work and developments*

556 At present, the heuristic method in AlphaPlantImpute works within the most  
557 common plant breeding program design of bi-parental populations and it works best  
558 when parents are fully inbred or close to being fully inbred. AlphaPlantImpute could  
559 be extended in multiple ways. For example, instead of treating each bi-parental  
560 population as an independent unit it could simultaneously work across bi-parental  
561 populations that share parents. This could increase the imputation accuracy in three  
562 ways: (i) information between bi-parental populations could be shared for imputation  
563 of focal individuals that are effectively half-sibs (one common parent); (ii)  
564 information between bi-parental populations could be used to resolve phase where  
565 one or both parents are heterozygous at one or more consecutive markers; and (iii) if a  
566 common parent has no or LD genotypes available, information from its descendants  
567 across half-sib bi-parental populations could be leveraged to phase and impute it to  
568 high-density.

569 AlphaPlantImpute could also be extended to include ancestral pedigree  
570 information (such as grandparents and great-grandparents). This could be useful for  
571 improving phasing and imputation of parents with missing information or that are  
572 highly outbred. More simply, AlphaPlantImpute could also be extended so that it can  
573 directly read in and exploit phased information for the fully or partially outbred  
574 parents. Such phased information could be generated for parents by running  
575 AlphaPlantImpute on the bi-parental family from which the fully or partially outbred  
576 parent derived.

577           AlphaPlantImpute could be extended so that it reads in previously inferred  
578 most likely linked alleles at two markers. It is likely that linkage patterns are shared  
579 across families, especially if the families are related. Using this information across  
580 families would be especially suited to imputation situations in bi-parental populations  
581 that have only a few genotyped focal individuals (e.g., one genotyped individual per  
582 family).

583           Finally, although SNP arrays for the many domesticated plant species exist,  
584 low-coverage sequencing methods such as genotyping-by-sequencing are also used.  
585 The heuristics of AlphaPlantImpute might be extended to enable imputation with such  
586 data.

587 *Software availability*

588           We implemented our method in a software package called AlphaPlantImpute,  
589 which is available for download at  
590 <http://www.AlphaGenes.roslin.ed.ac.uk/AlphaPlantImpute/> along with a user manual.

591

592 **Acknowledgments**

593           The authors acknowledge the financial support from the BBSRC ISP grant

594 number ‘BB/P013759/1’ and from the BBSRC KWS grant number ‘BB/R002061/1’.

595 This work has made use of the resources provided by the Edinburgh Compute and

596 Data Facility (ECDF) (<http://www.ecdf.ed.ac.uk>).

597

598

599 **References**

- 600 Antolín, R., C. Nettelblad, G. Gorjanc, D. Money, and J.M. Hickey. 2017. A hybrid  
601 method for the imputation of genomic data in livestock populations. *Genet.*  
602 *Sel. Evol.* 49(1): 30. doi: 10.1186/s12711-017-0300-y.
- 603 Chen, G.K., P. Marjoram, and J.D. Wall. 2009. Fast and flexible simulation of DNA  
604 sequence data. *Genome Res.* 19(1): 136–142. doi: 10.1101/gr.083634.108.
- 605 Cleveland, M.A., and J.M. Hickey. 2013. Practical implementation of cost-effective  
606 genomic selection in commercial pig breeding using imputation. *J. Anim. Sci.*  
607 91(8): 3583–3592. doi: 10.2527/jas.2013-6270.
- 608 Druet, T., and M. Georges. 2010. A Hidden Markov Model Combining Linkage and  
609 Linkage Disequilibrium Information for Haplotype Reconstruction and  
610 Quantitative Trait Locus Fine Mapping. *Genetics* 184(3): 789–798. doi:  
611 10.1534/genetics.109.108431.
- 612 Faux, A.-M., G. Gorjanc, R.C. Gaynor, M. Battagin, S.M. Edwards, D.L. Wilson, S.J.  
613 Hearne, S. Gonen, and J.M. Hickey. 2016. AlphaSim: Software for Breeding  
614 Program Simulation. *Plant Genome* 9(3). doi:  
615 10.3835/plantgenome2016.02.0013.
- 616 Gorjanc, G., M. Battagin, J.-F. Dumasy, R. Antolin, R.C. Gaynor, and J.M. Hickey.  
617 2017a. Prospects for Cost-Effective Genomic Selection via Accurate Within-  
618 Family Imputation. *Crop Sci.* 57(1): 216. doi: 10.2135/cropsci2016.06.0526.
- 619 Gorjanc, G., J.-F. Dumasy, S. Gonen, R.C. Gaynor, R. Antolin, and J.M. Hickey.  
620 2017b. Potential of Low-Coverage Genotyping-by-Sequencing and Imputation  
621 for Cost-Effective Genomic Selection in Biparental Segregating Populations.  
622 *Crop Sci.* 57(3): 1404–1420. doi: 10.2135/cropsci2016.08.0675.
- 623 Hickey, J.M., G. Gorjanc, R.K. Varshney, and C. Nettelblad. 2015. Imputation of  
624 Single Nucleotide Polymorphism Genotypes in Biparental, Backcross, and  
625 Topcross Populations with a Hidden Markov Model. *Crop Sci.* 55(5): 1934–  
626 1946. doi: 10.2135/cropsci2014.09.0648.
- 627 Hickey, J.M., B.P. Kinghorn, B. Tier, J.F. Wilson, N. Dunstan, and J.H. van der Werf.  
628 2011. A combined long-range phasing and long haplotype imputation method  
629 to impute phase for SNP genotypes. *Genet. Sel. Evol.* 43(1): 12. doi:  
630 10.1186/1297-9686-43-12.
- 631 Hickey, J.M., and A. Kranis. 2013. Extending long-range phasing and haplotype  
632 library imputation methods to impute genotypes on sex chromosomes. *Genet.*  
633 *Sel. Evol.* 45(1): 10. doi: 10.1186/1297-9686-45-10.
- 634 Howie, B.N., P. Donnelly, and J. Marchini. 2009. A flexible and accurate genotype  
635 imputation method for the next generation of genome-wide association  
636 studies. *PLoS Genet.* 5(6): e1000529.

- 637 Jacobson, A., L. Lian, S. Zhong, and R. Bernardo. 2014. General Combining Ability  
638 Model for Genomewide Selection in a Biparental Cross. *Crop Sci.* 54(3): 895.  
639 doi: 10.2135/cropsci2013.11.0774.
- 640 Jacobson, A., L. Lian, S. Zhong, and R. Bernardo. 2015. Marker imputation before  
641 genomewide selection in biparental maize populations. *Plant Genome* 8(2): 9.  
642 doi: doi:10.3835/plantgenome2014.10.0078.
- 643 Kong, A., G. Masson, M.L. Frigge, A. Gylfason, P. Zusmanovich, G. Thorleifsson,  
644 P.I. Olason, A. Ingason, S. Steinberg, T. Rafnar, P. Sulem, M. Mouy, F.  
645 Jonsson, U. Thorsteinsdottir, D.F. Gudbjartsson, H. Stefansson, and K.  
646 Stefansson. 2008. Detection of sharing by descent, long-range phasing and  
647 haplotype imputation. *Nat. Genet.* 40(9): 1068–1075. doi: 10.1038/ng.216.
- 648 Li, Y., C.J. Willer, J. Ding, P. Scheet, and G.R. Abecasis. 2010. MaCH: using  
649 sequence and genotype data to estimate haplotypes and unobserved genotypes.  
650 *Genet. Epidemiol.* 34(8): 816–834. doi: 10.1002/gepi.20533.
- 651 Loh, P.-R., P. Danecek, P.F. Palamara, C. Fuchsberger, Y. A Reshef, H. K Finucane,  
652 S. Schoenherr, L. Forer, S. McCarthy, G.R. Abecasis, R. Durbin, and A. L  
653 Price. 2016. Reference-based phasing using the Haplotype Reference  
654 Consortium panel. *Nat. Genet.* 48(11): 1443–1448. doi: 10.1038/ng.3679.
- 655 Nettelblad, C., S. Holmgren, L. Crooks, and Ö. Carlborg. 2009. cnF2freq: Efficient  
656 Determination of Genotype and Haplotype Probabilities in Outbred  
657 Populations Using Markov Models. p. 307–319. *In* Rajasekaran, S. (ed.),  
658 *Bioinformatics and Computational Biology. Lecture Notes in Computer  
659 Science.* Springer Berlin Heidelberg.
- 660 O’Connell, J., K. Sharp, N. Shrine, L. Wain, I. Hall, M. Tobin, J.-F. Zagury, O.  
661 Delaneau, and J. Marchini. 2016. Haplotype estimation for biobank-scale data  
662 sets. *Nat. Genet.* advance online publication. doi: 10.1038/ng.3583.
- 663 Sargolzaei, M., J.P. Chesnais, and F.S. Schenkel. 2011. FImpute - An efficient  
664 imputation algorithm for dairy cattle populations. *J. Dairy Sci.* 94 (E-Suppl.  
665 1): 421.
- 666 Swarts, K., H. Li, J.A. Romero Navarro, D. An, M.C. Romay, S. Hearne, C. Acharya,  
667 J.C. Glaubitz, S. Mitchell, R.J. Elshire, E.S. Buckler, and P.J. Bradbury. 2014.  
668 Novel Methods to Optimize Genotypic Imputation for Low-Coverage, Next-  
669 Generation Sequence Data in Crop Plants. *Plant Genome* 7(3): 0. doi:  
670 10.3835/plantgenome2014.05.0023.
- 671 VanRaden, P.M., C. Sun, and J.R. O’Connell. 2015. Fast imputation using medium or  
672 low-coverage sequence data. *BMC Genet.* 16(1): 82. doi: 10.1186/s12863-  
673 015-0243-7.

674

675

676 **Figure captions**

677 **Figure 1. Schematic of heuristic algorithm of AlphaPlantImpute.**

678 **Figure 2. Effect of the number of SNP on the low-density array.**

679 **Figure 3. Effect of level of inbreeding in focal individuals.**

680 **Figure 4. Effect of the level of inbreeding in parents.**

681 **Figure 5. Effect of chromosome size.**

682

683 **Table captions**

684 **Table 1. Computational requirements of AlphaPlantImpute.**

685

686 **Supplementary Files**

687 **Supplementary File 1. Detailed schematic of heuristic algorithm of**  
688 **AlphaPlantImpute.**

689



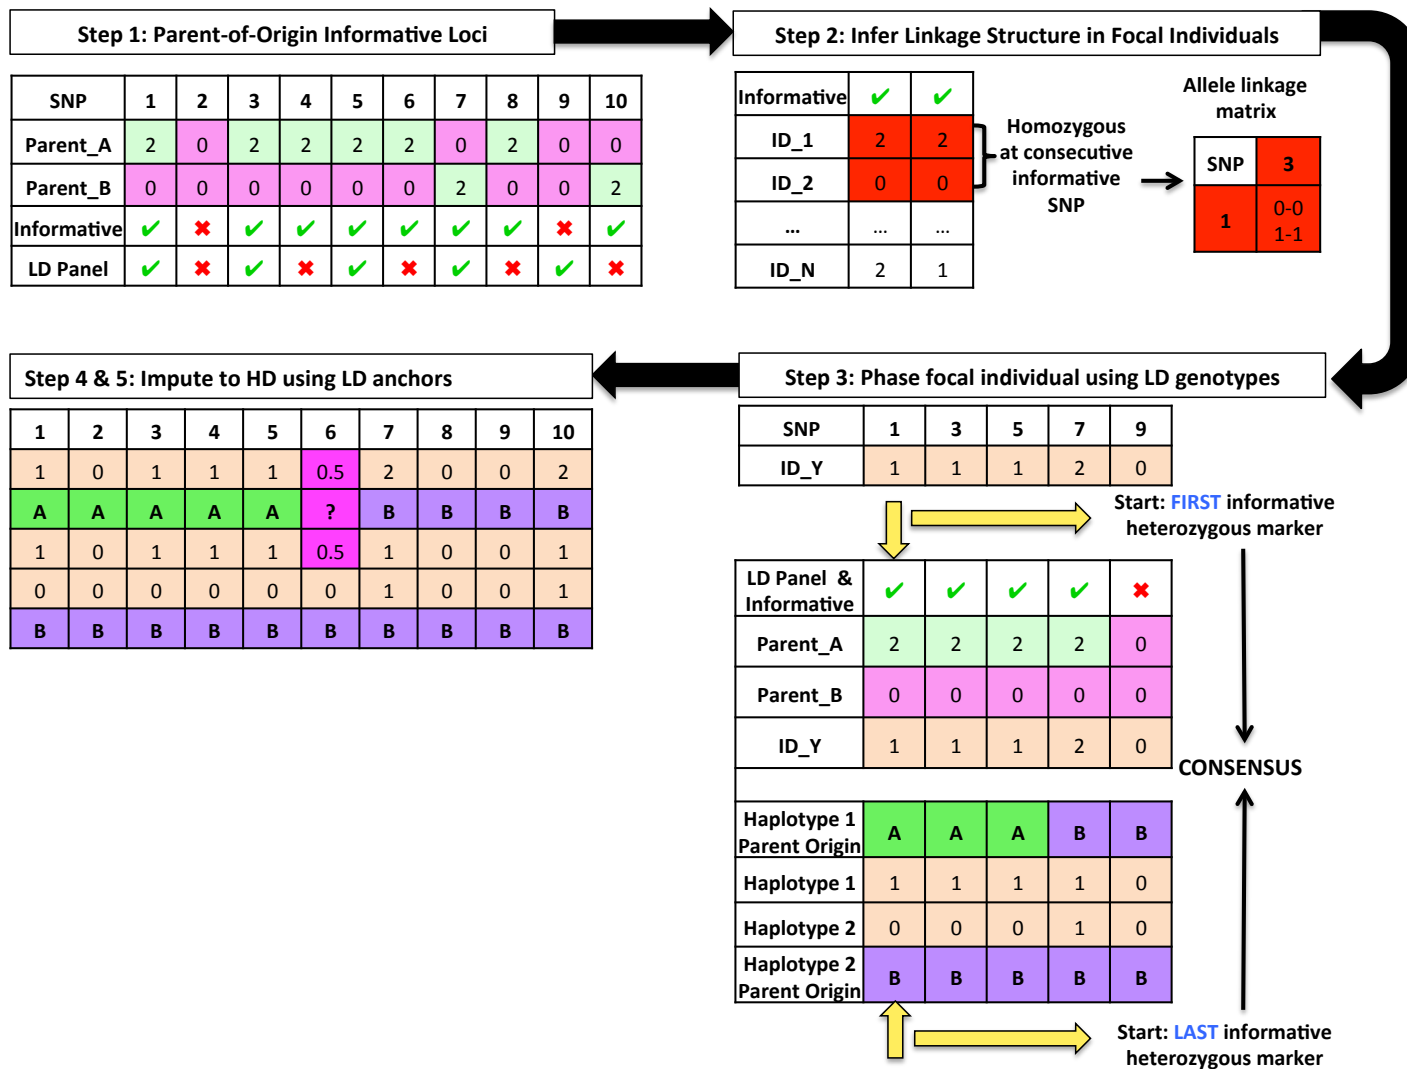

Figure 1 – Schematic of heuristic algorithm of AlphaPlantImpute

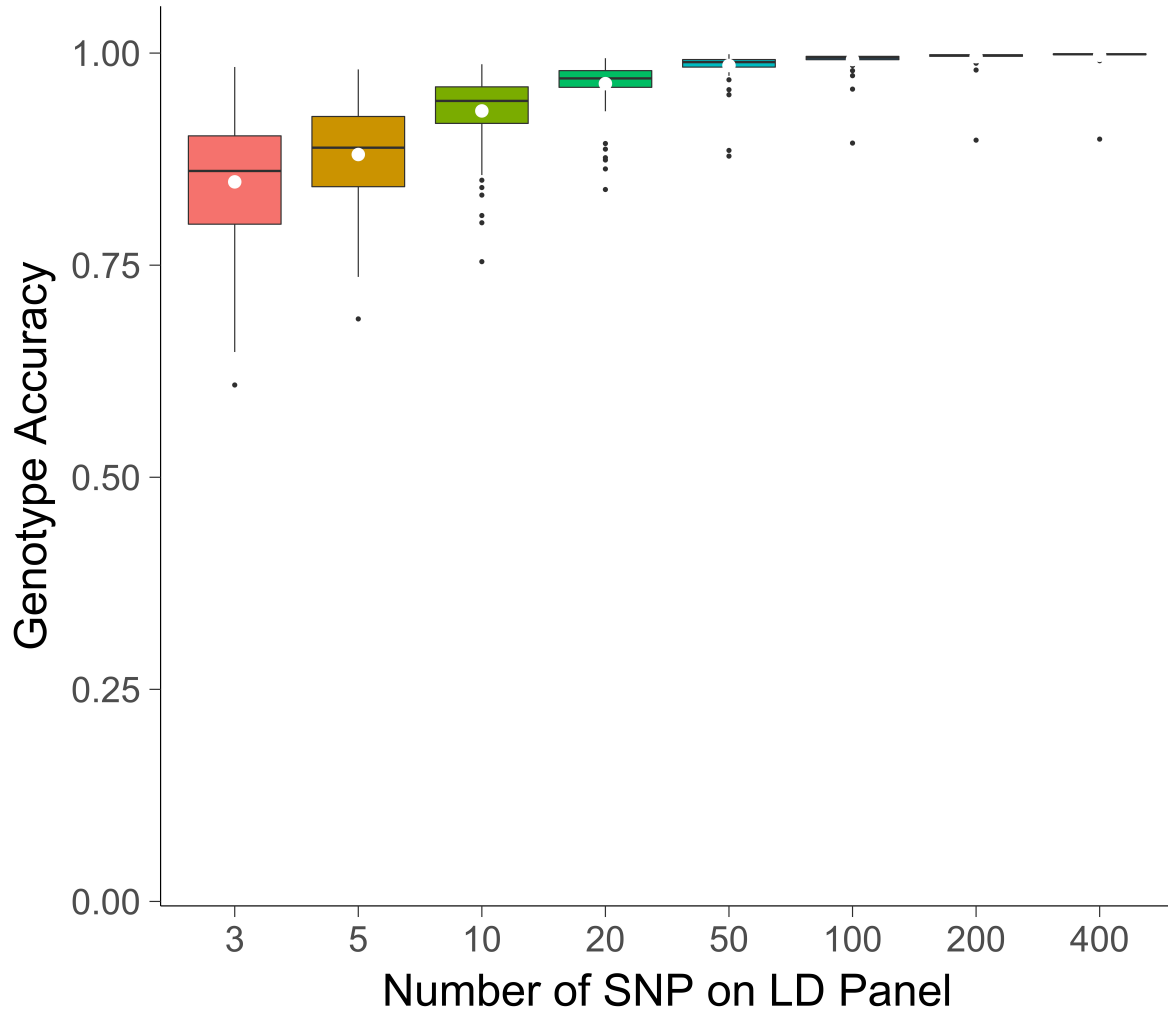

Figure 2 – Effect of the number of SNP on the low-density panel.

The number of SNP on the LD panel against the genotype imputation accuracy using AlphaPlantImpute for  $F_2$  focal individuals of a bi-parental cross where the parents are  $F_{20}$  inbred individuals.

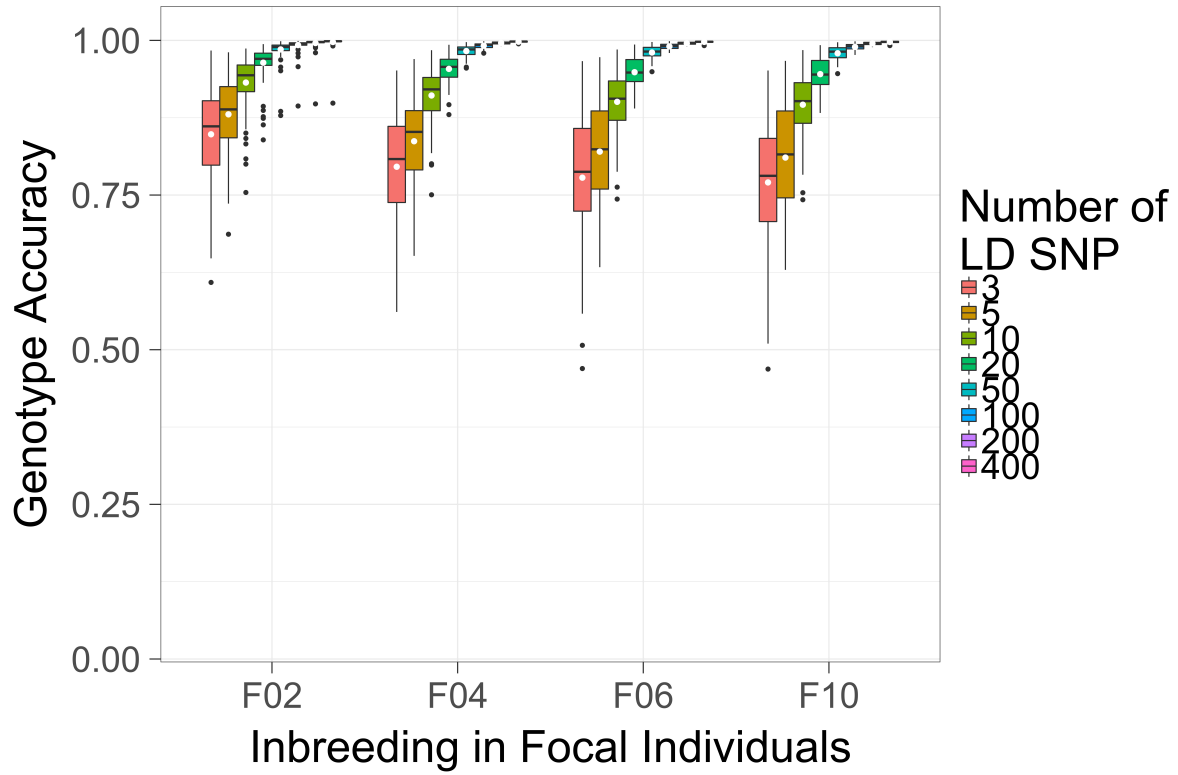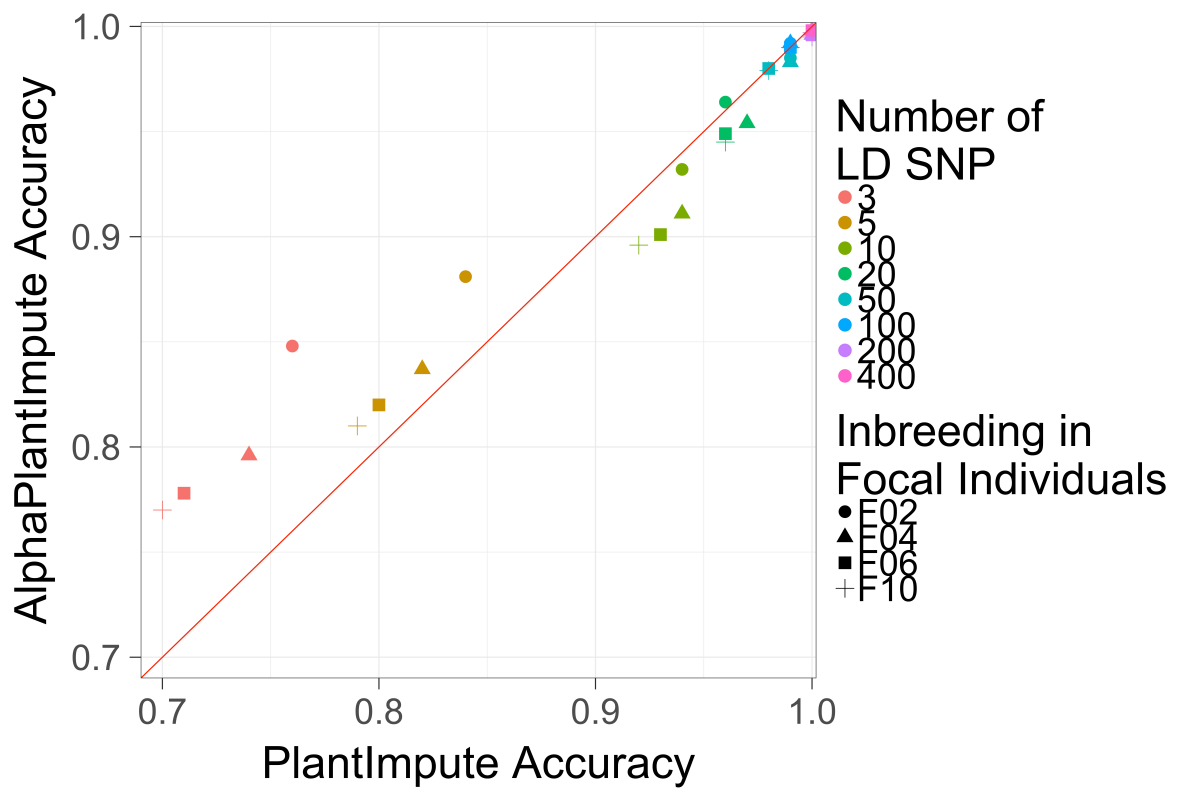

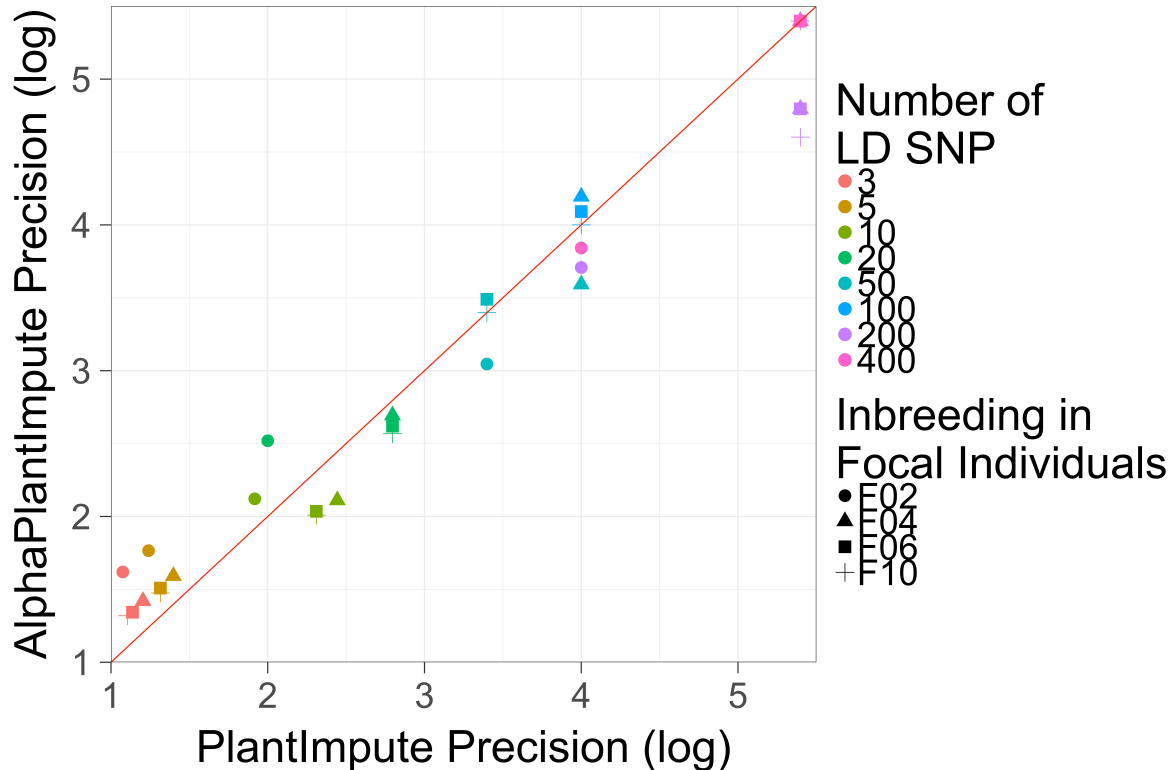

Figure 3 – Effect of the level of inbreeding in focal individuals.

(a) The genotype imputation accuracy using AlphaPlantImpute in F<sub>2</sub>, F<sub>4</sub>, F<sub>6</sub> and F<sub>10</sub> focal individuals from a bi-parental cross where the parents are F<sub>20</sub> inbred individuals.

(b) Comparison of the average genotype imputation accuracy using AlphaPlantImpute (y-axis) vs. PlantImpute (x-axis). The colours represent the different LD panels. The shapes represent the level of inbreeding in the focal individuals. The red diagonal line indicates when the accuracy of PlantImpute equals AlphaPlantImpute. Points above the line are when imputation accuracy is higher with AlphaPlantImpute and points below the line are when imputation accuracy is higher with PlantImpute.

(c) Comparison of the precision in imputation accuracy using AlphaPlantImpute (y-axis) vs. using PlantImpute (x-axis). The colours represent the different LD panels. The shapes represent the level of inbreeding in the focal individuals. The red diagonal line indicates when the precision of PlantImpute equals AlphaPlantImpute. Points above the line indicate when the precision in accuracies is higher in AlphaPlantImpute and points below the line are when the precision in accuracies is higher in PlantImpute.

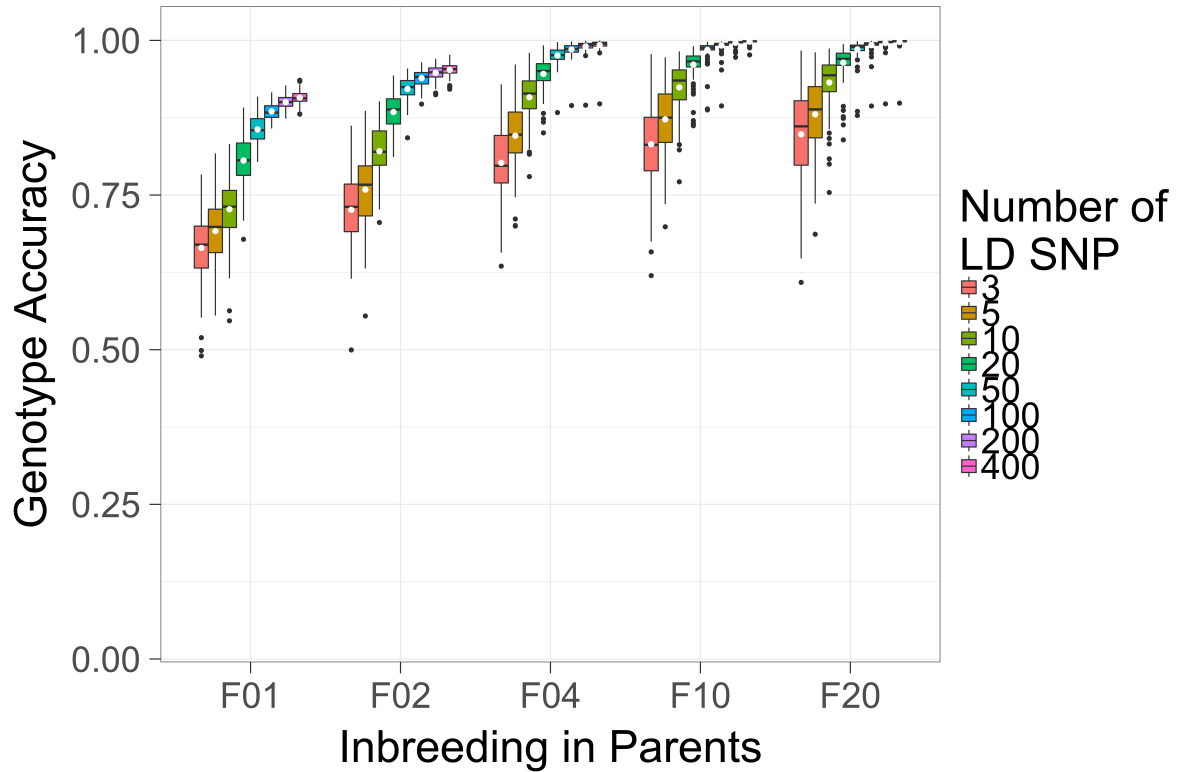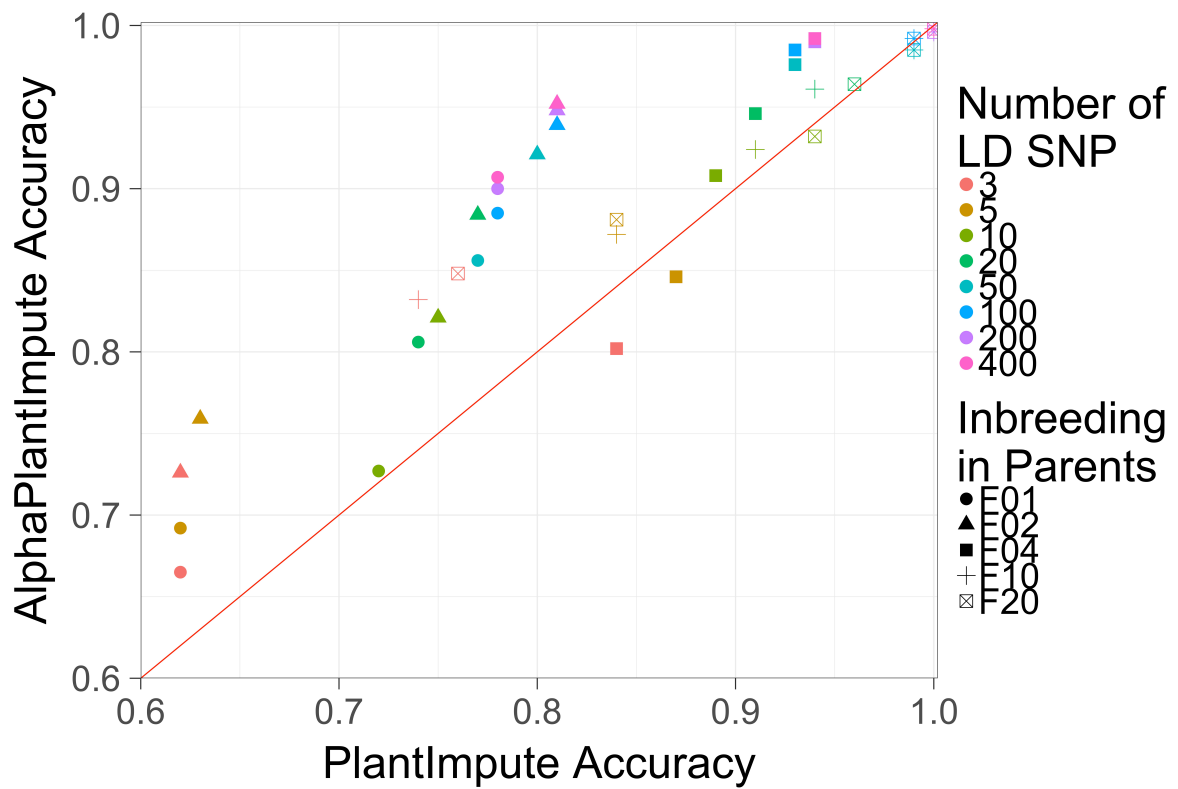

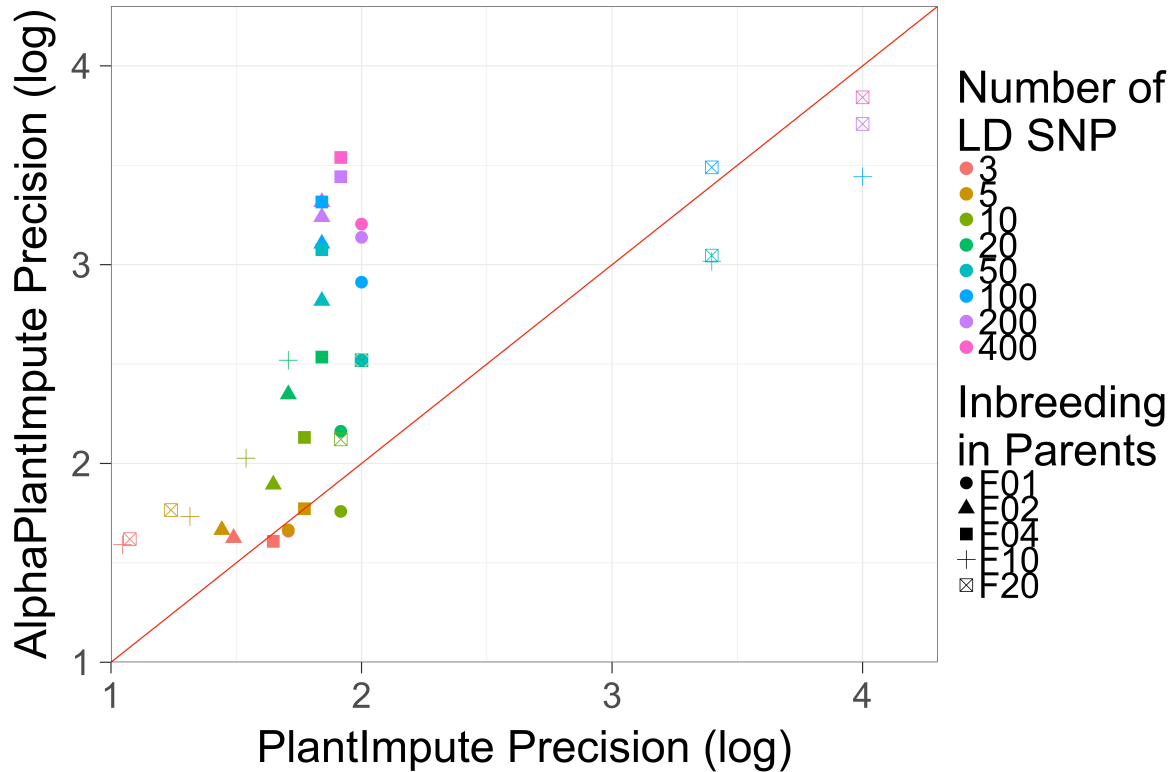

Figure 4 – Effect of the level of inbreeding in parents.

(a) The genotype imputation accuracy using AlphaPlantImpute in F<sub>2</sub> focal individuals of a bi-parental cross where the parents are F<sub>1</sub>, F<sub>2</sub>, F<sub>4</sub>, F<sub>10</sub> or F<sub>20</sub>.

(b) Comparison of the average genotype imputation accuracy using AlphaPlantImpute (y-axis) vs. using PlantImpute (x-axis). The colours represent the different LD panels. The shapes represent the level of inbreeding in the parents. The red diagonal line indicates when the accuracy of PlantImpute equals AlphaPlantImpute. Points above the line are when imputation accuracy is higher with AlphaPlantImpute and points below the line are when imputation accuracy is higher with PlantImpute.

(c) Comparison of the precision in imputation accuracy using AlphaPlantImpute (y-axis) vs. using PlantImpute (x-axis). The colours represent the different LD panels. The shapes represent the level of inbreeding in the parents. The red diagonal line indicates when the precision of PlantImpute equals AlphaPlantImpute. Points above the line indicate when the precision in accuracies is higher in AlphaPlantImpute and points below the line are when the precision in accuracies is higher in PlantImpute.

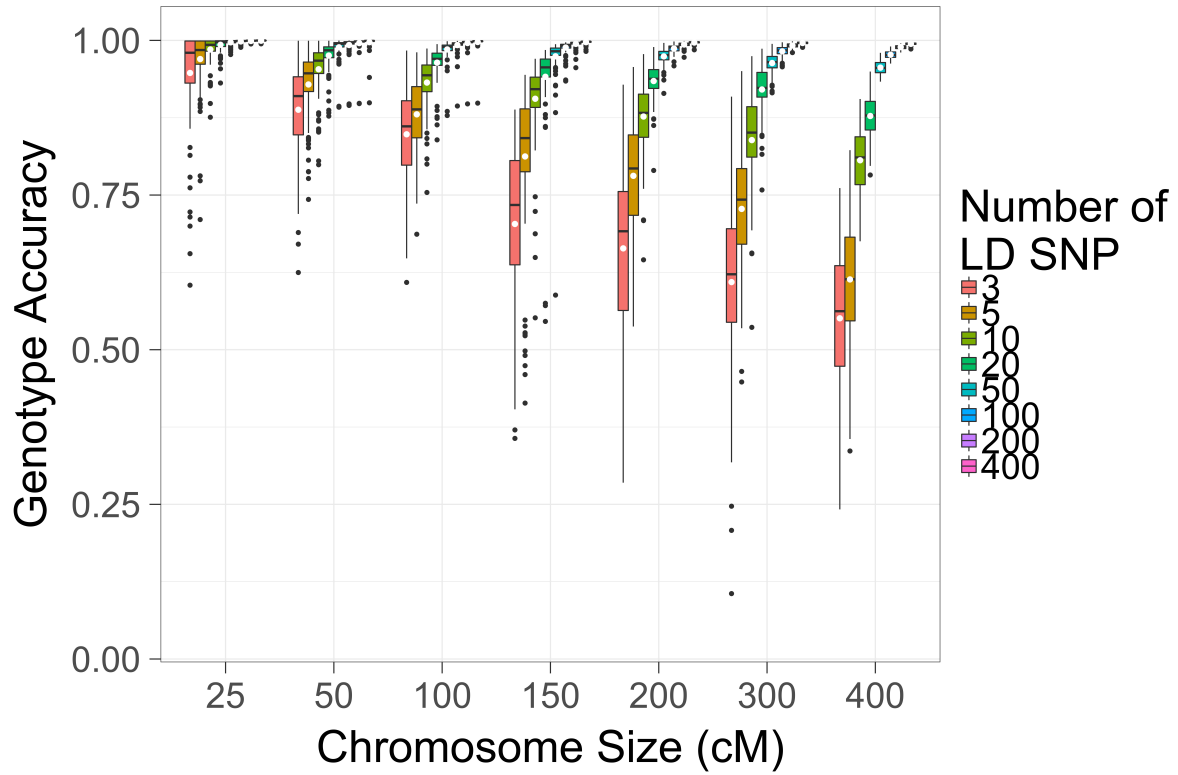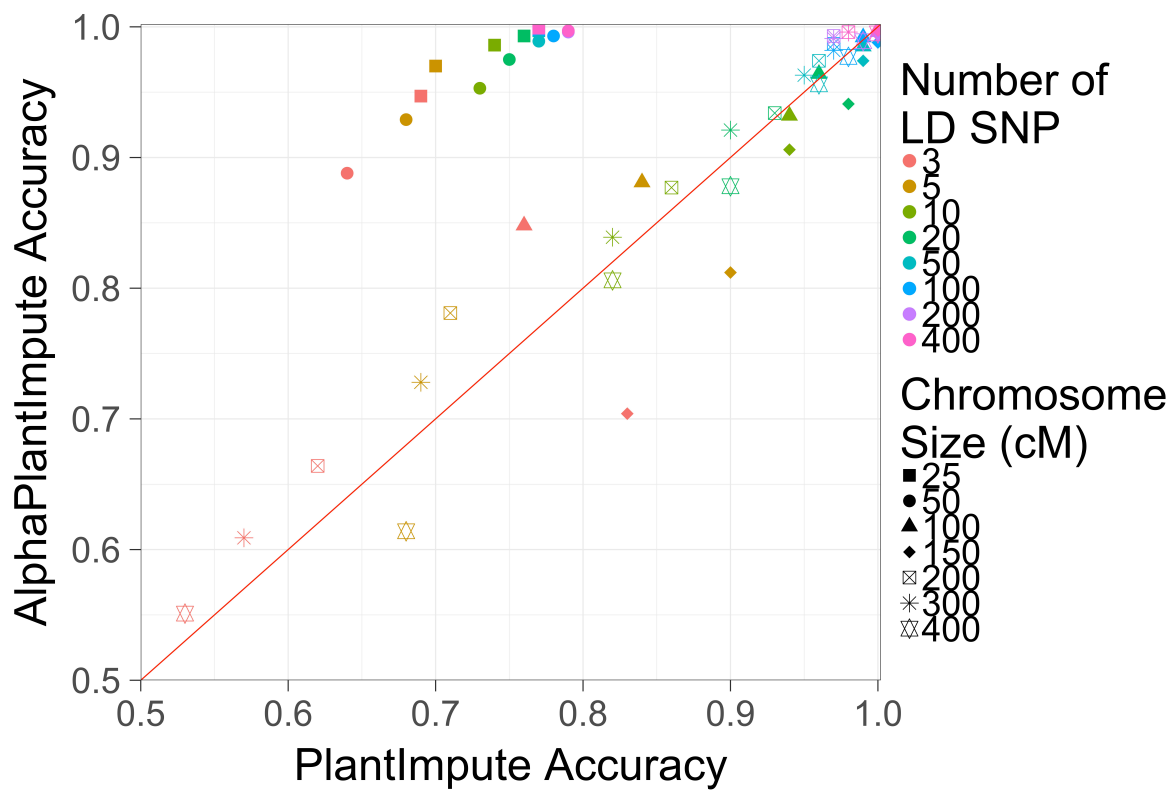

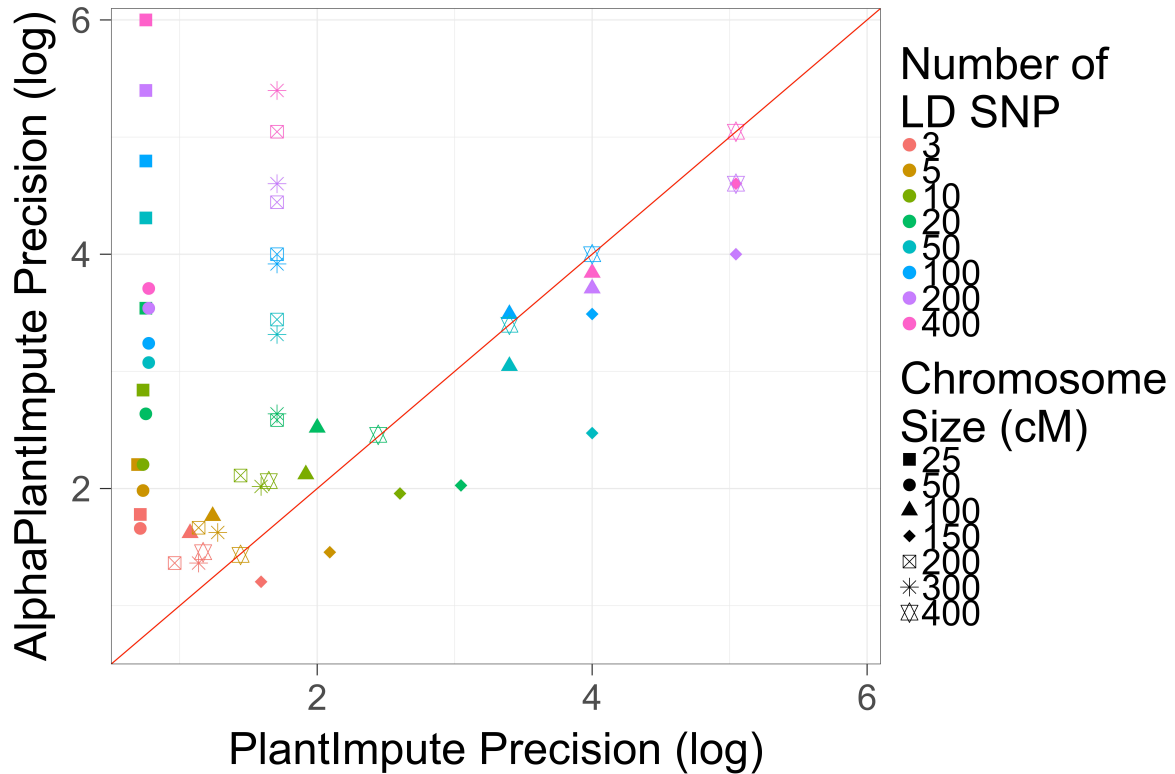

Figure 5 – Effect of chromosome size.

(a) The genotype imputation accuracy using AlphaPlantImpute in F<sub>2</sub> focal individuals from a bi-parental cross of F<sub>20</sub> parents against seven chromosome sizes of 25, 50, 100, 150, 200, 300, and 400 cM.

(b) Comparison of the average genotype imputation accuracy using AlphaPlantImpute (y-axis) vs. using PlantImpute (x-axis). The colours represent the different LD panels. The shapes represent the chromosome size. The red diagonal line indicates when the accuracy of PlantImpute equals AlphaPlantImpute. Points above the line are when imputation accuracy is higher with AlphaPlantImpute and points below the line are when imputation accuracy is higher with PlantImpute.

(c) Comparison of the precision in imputation accuracy using AlphaPlantImpute (y-axis) vs. using PlantImpute (x-axis). The colours represent the different LD panels. The shapes represent the chromosome size. The red diagonal line indicates when precision of PlantImpute equals AlphaPlantImpute. Points above the line indicate when the precision in accuracies is higher in AlphaPlantImpute and points below the line are when the precision in accuracies is higher in PlantImpute.



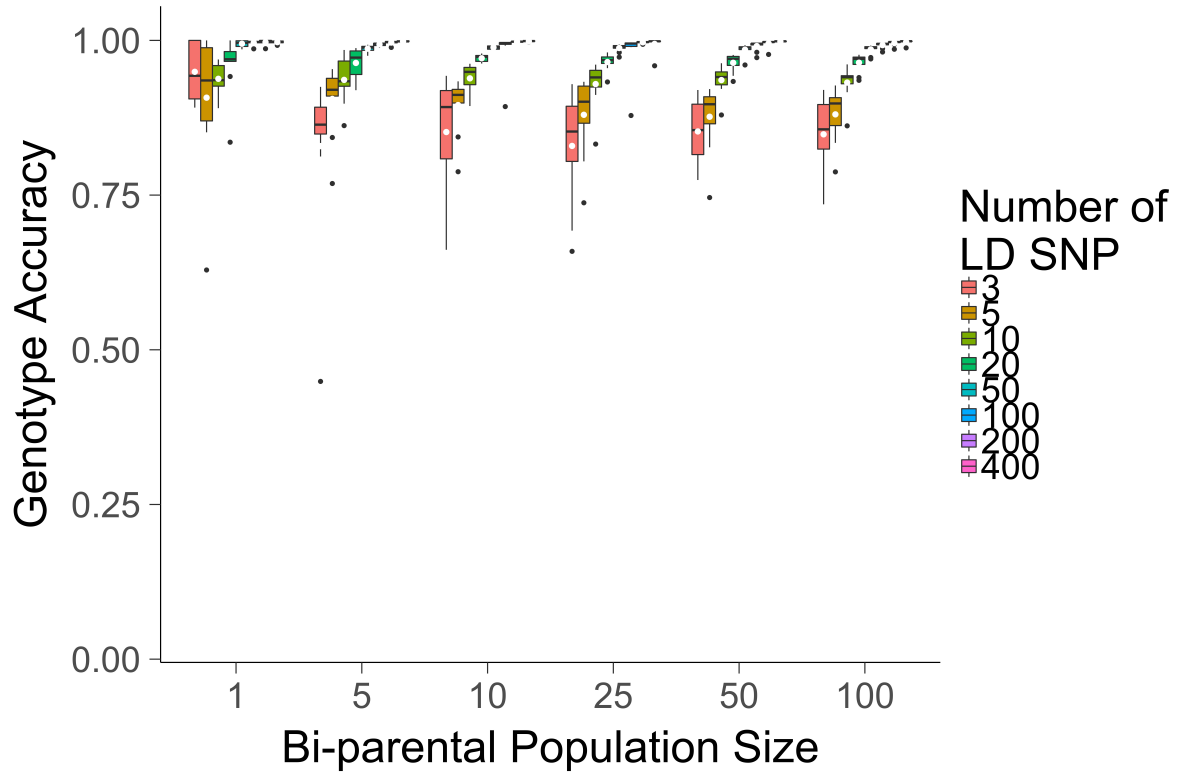

Figure 6 – Effect of the number of focal individuals in the bi-parental population.

The number of focal individuals in the bi-parental population against the genotype imputation accuracy using AlphaPlantImpute for  $F_2$  focal individuals of a bi-parental cross where the parents are  $F_{20}$  inbred individuals.

Table 1 – Computational requirements of AlphaPlantImpute

| Parents         | Focal Individuals | LD panel | Time (Seconds) | Memory (Gb)  |
|-----------------|-------------------|----------|----------------|--------------|
| F20             | F2                | 3        | 37.41          | 0.079        |
| F20             | F2                | 50       | 8.14           | 0.080        |
| F20             | F2                | 400      | 7.95           | 0.082        |
| F20             | F10               | 3        | 49.33          | 0.079        |
| F20             | F10               | 50       | 8.48           | 0.080        |
| F20             | F10               | 400      | 9.40           | 0.082        |
| F1              | F2                | 3        | 26.70          | 0.080        |
| F1              | F2                | 50       | 35.10          | 0.080        |
| F1              | F2                | 400      | 12.58          | 0.082        |
| F1              | F10               | 3        | 24.66          | 0.079        |
| F1              | F10               | 50       | 35.41          | 0.080        |
| F1              | F10               | 400      | 10.35          | 0.082        |
| <b>Average:</b> |                   |          | <b>22.13</b>   | <b>0.080</b> |
